# Supplementary material
Source: MDPI journal article supplement (https://www.mdpi.com/2071-1050/3/10/1778)

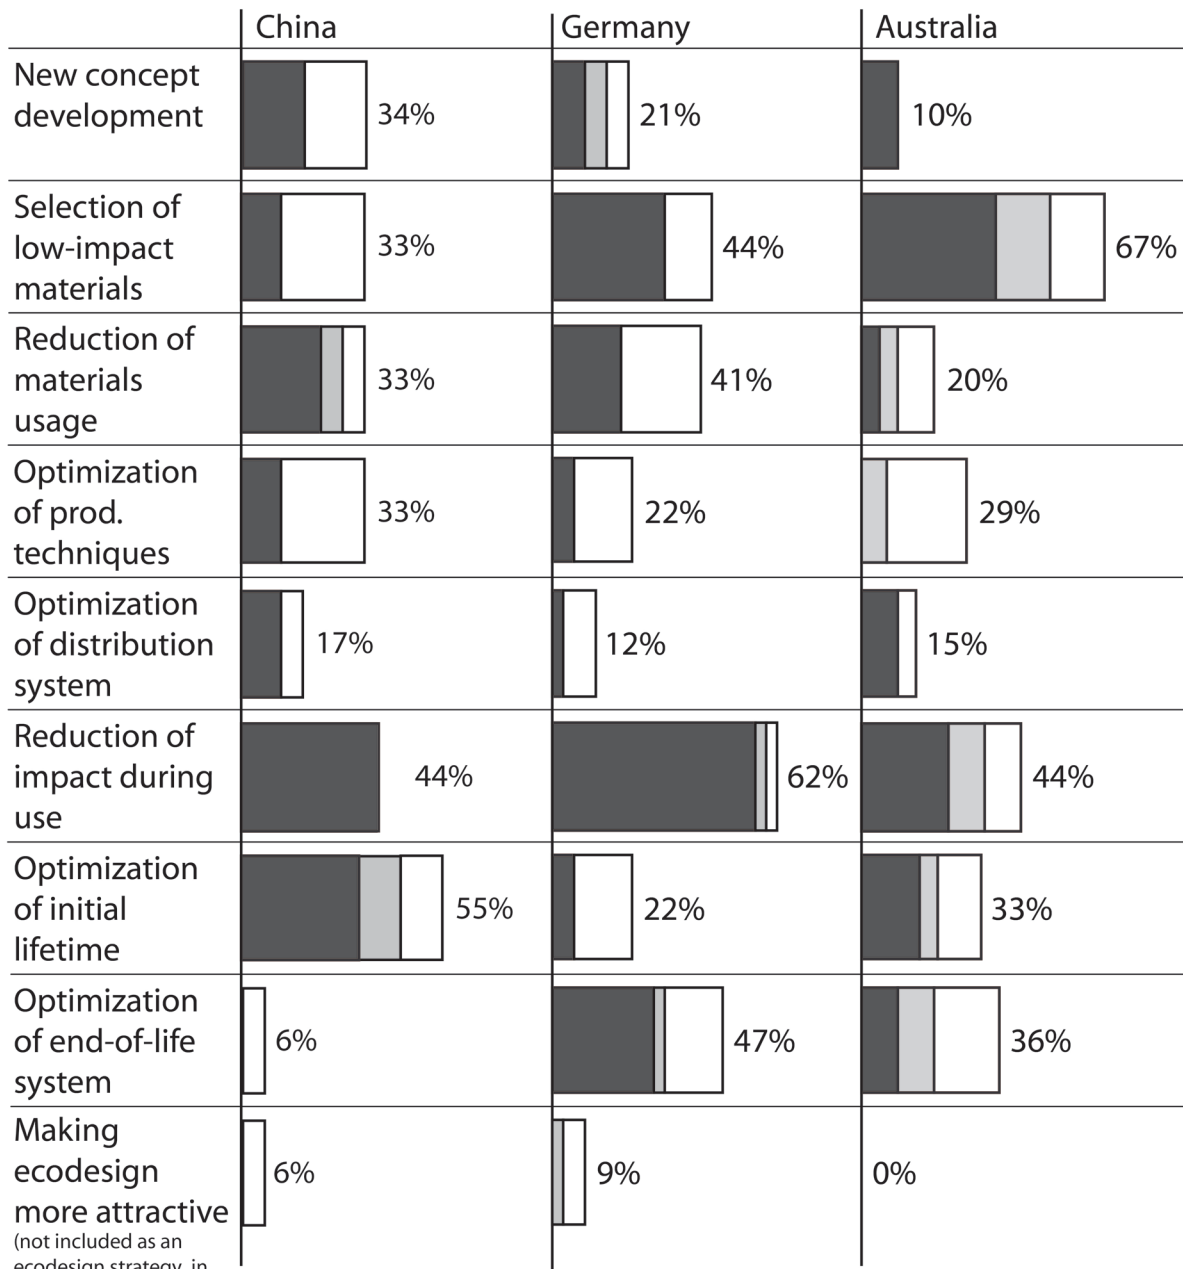

(100% equals only the environmental aware ID consultancies in each country)

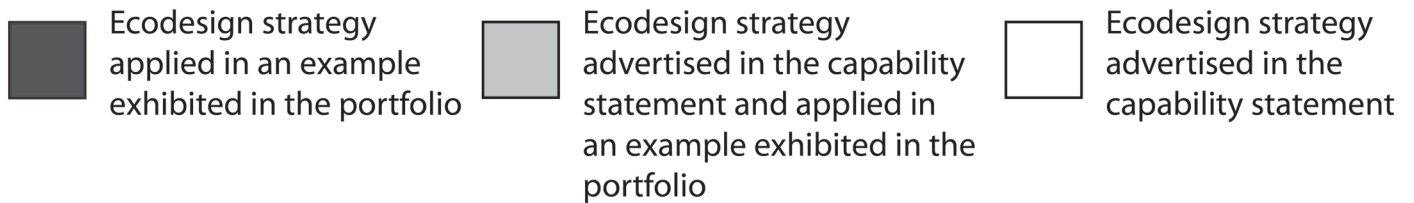

Supplement: s1 [file s1]
